# Supplementary material for: Evaluation of Reference Genes for Quantitative Reverse Transcription Polymerase Chain Reaction in Bactrocera dorsalis (Diptera: Tephritidae) Subjected to Various Phytosanitary Treatments
Source: MDPI journal article supplement (doi:10.3390/insects12100945), 2021-10-18
Supplement: s1 [file s1]

## Supplementary Materials

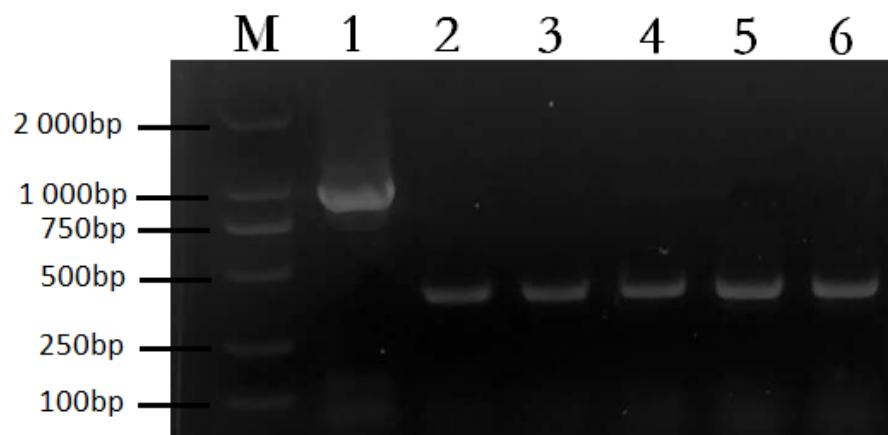

**Figure S1.** The electrophoregram of PCR of G6PDH gene using different templates. The M lane represents the DNA marker; the 1 lane represents the positive control; and the 2–6 lane represents the expunged cDNA, each sample is mixed with a different dose of the samples.

**Table S1.** Total RNA concentrations and A260: A280 values. FZ: irradiation; XZ: MB fumigation; R: heat treatment; L: cold treatment. Numbers 1 and 2 represent different doses.

| Template RNA | Concentration (ng/ $\mu$ L) | A260: A280 |
|--------------|-----------------------------|------------|
| CK           | 2780                        | 2.17       |
| FZ-1         | 2106                        | 2.14       |
| FZ-2         | 2351                        | 2.11       |
| XZ-1         | 2621                        | 2.19       |
| XZ-2         | 1842                        | 2.14       |
| R-1          | 2212                        | 2.20       |
| R-2          | 1396                        | 2.16       |
| L-1          | 2040                        | 2.17       |
| L-2          | 2005                        | 2.22       |
